# Supplementary material
Source: publisher figshare collection journal article supplement (https://frontiersin.figshare.com/ndownloader/files/25261439)
Supplement: Supplementary file 1 [file 25261439]

## Supplemental File S4

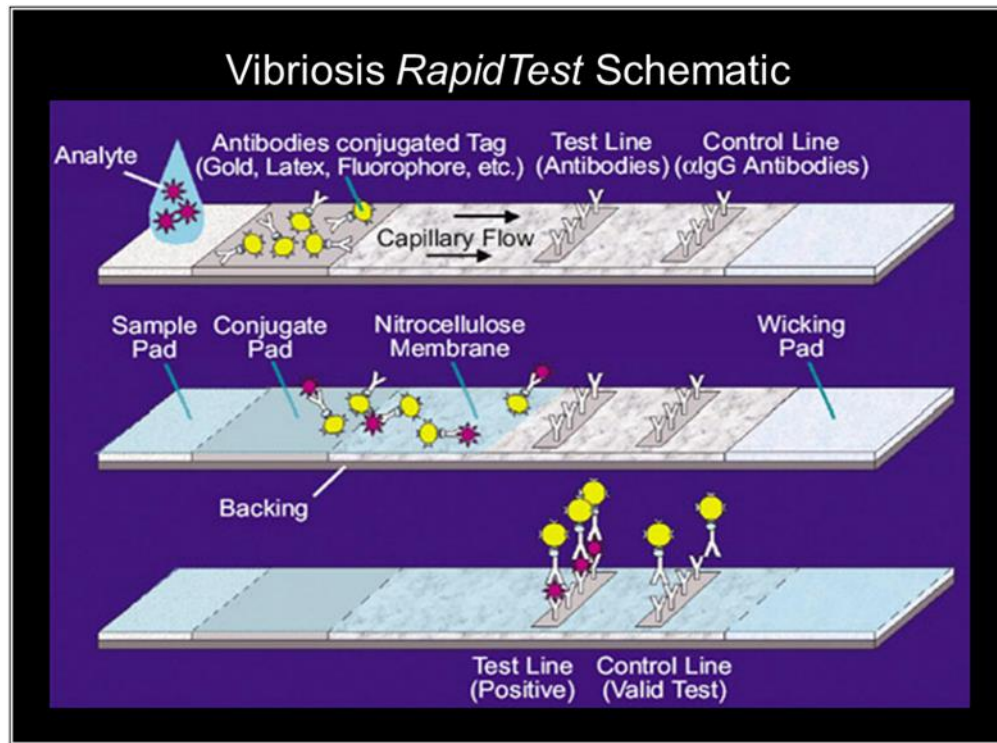

Supplemental Figure S3 is a schematic of the *VcpA RapidTest*, which is an improved and simplified version of a prototype 2-site immunoassay for *VcpA* previously described by (Gharaibeh et al., 2013). The prototype assay was successfully transitioned from a complicated lab-based test into a robust, highly sensitive, yet extremely simple diagnostic test, suitable for either lab or in-field use. Sensitivity and specificity of the prototype assay was improved by 1) reversing orientation of the *VcpA*-specific capture and detector monoclonal antibodies (mAbs), 2) optimizing sensitivity and stability of the nano-gold particle detector mAbs, 3) incorporating a proprietary blocking agent on the sample pad to reduce background to undetectable levels, and 4) addition of low protein binding sample filtration pad under the sample well to facilitate use of turbid samples without the need for extensive processing. Finally, the test was simplified greatly and made easy to use by incorporating all components into robust, single use plastic cassettes.

In summary, the *VcpA RapidTest* is robust (rugged, durable, and reliable), easy to use (simply add a few drops of unprocessed seawater to the sample port), rapid ( $\leq 20$  minutes) and highly sensitive. The limit of detection (LOD) of purified recombinant *VcpA* by the current *Vibriosis RapidTest* is 5 ng/ml, which is a 100-fold increase in sensitivity over the LOD (500 ng/ml) of the prototype test and 20-fold below the concentration of *VcpA* that causes mortality of oyster larva under laboratory conditions (100 ng/ml, Hasegawa et al., 2009).

The *VcpA RapidTest* uses a pair of mAbs, both of which are specific for *VcpA*, but bind two different epitopes on *VcpA*. One mAb is used to capture soluble *VcpA* from a sample while the second mAb is used to detect the captured *VcpA*. The assay is therefore a 2-site

immunocapture/detector assay. The assay is termed a Lateral Flow Immunoassay (LFI) because samples flow laterally through a series of pads and nitrocellulose matrices. When a sample is loaded, it flows laterally through the conjugate zone, solubilizing gold-detector mAbs and then through the capture mAb zone. Capture mAbs immobilized on the Test Line bind to one epitope on a molecule of VcpA, while soluble detector mAbs (labeled with colloidal nano-gold particles) bind a second epitope on the same molecule of VcpA. If the target antigen is present in the sample, sandwiches of capture mAb:antigen:gold-detector mAb accumulate on the Test Line which then becomes dark and visible to the naked eye. Intensity of signal is proportional to antigen concentration.

A procedural control line is composed of a third set of antibodies that can specifically bind and immobilize gold-conjugated anti-VcpA capture mAbs directly, in either the presence or absence of VcpA. A positive signal on the control line therefore confirms that the test was conducted properly and that the sample flowed through the entire device.
