# Supplementary material
Source: publisher figshare collection journal article supplement (https://frontiersin.figshare.com/ndownloader/files/25261439)
Supplement: Supplementary file 2 [file 25261439]

## Supplementary File S6

### Laboratory diseased *M. cavernosa* (based on collection location)

|                             | Total         | Ft. Lauderdale | FL Keys       |
|-----------------------------|---------------|----------------|---------------|
| # coral fragments           | 67            | 24             | 43            |
| Disease stopped             | 26<br>(38.8%) | 8<br>(33.3%)   | 18<br>(41.9%) |
| Slow progression over >21 d | 14<br>(21.0%) | 7<br>(29.2%)   | 7<br>(16.3%)  |
| Complete mortality <21 d    | 27<br>(40.3%) | 9<br>(37.5%)   | 18<br>(41.8%) |
| VcpA+                       | 16<br>(23.9%) | 4<br>(16.7%)   | 12<br>(27.9%) |
| Tissue loss only            | 32<br>(47.8%) | 8<br>(33.3%)   | 24<br>(55.8%) |
| Tissue loss + Bleaching     | 23<br>(34.3%) | 14<br>(58.3%)  | 9<br>(20.9%)  |
| Bleaching only              | 12<br>(17.9%) | 2<br>(0.83%)   | 10<br>(23.2%) |

\*Percents are out of the total corals from a specific location (Total, Ft. Lauderdale, or FL Keys)

### Laboratory diseased *M. cavernosa* (based on VcpA test)

|                             | Total         | VcpA-         | VcpA+          |
|-----------------------------|---------------|---------------|----------------|
| # coral fragments           | 67            | 53            | 16             |
| Disease stopped             | 26<br>(38.8%) | 26<br>(49.0%) | 0<br>(0.0%)    |
| Slow progression over >21 d | 14<br>(20.9%) | 14<br>(26.4%) | 0<br>(0.0%)    |
| Complete mortality <21 d    | 29<br>(43.3%) | 13<br>(25.5%) | 16<br>(100.0%) |
| Tissue loss only            | 34<br>(50.7%) | 21<br>(39.6%) | 13<br>(68.8%)  |
| Tissue loss + Bleaching     | 23<br>(34.3%) | 20<br>(37.7%) | 3<br>(21.4%)   |
| Bleaching only              | 12<br>(17.9%) | 12<br>(22.6%) | 0<br>(0.0%)    |

\*Percents are out of the total corals with a specific VcpA assay result (Total, VcpA-, or VcpA+)

**Laboratory diseased *O. faveolata* (based on collection location)**

|                                       | <b>Total</b>  | <b>Ft. Lauderdale</b> | <b>FL Keys</b> |
|---------------------------------------|---------------|-----------------------|----------------|
| <b># coral fragments</b>              | <b>24</b>     | <b>4</b>              | <b>20</b>      |
| <b>Disease stopped</b>                | 8<br>(33.3%)  | 2<br>(50.0%)          | 6<br>(30.0%)   |
| <b>Slow progression over &gt;21 d</b> | 2<br>(0.8%)   | 0<br>(0.0%)           | 2<br>(10.0%)   |
| <b>Complete mortality &lt;21 d</b>    | 12<br>(50.0%) | 2<br>(50.0%)          | 10<br>(50.0%)  |
| <b>VcpA+</b>                          | 5<br>(20.8%)  | 1<br>(25.0%)          | 4<br>(20.0%)   |
| <b>Tissue loss only</b>               | 10<br>(41.7%) | 2<br>(50.0%)          | 8<br>(40.0%)   |
| <b>Tissue loss + Bleaching</b>        | 9<br>(37.5%)  | 1<br>(25.0%)          | 8<br>(40.0%)   |
| <b>Bleaching only</b>                 | 3<br>(12.5%)  | 1<br>(25.0%)          | 2<br>(10.0%)   |

\*Percents are out of the total corals from a specific location (Total, Ft. Lauderdale, or FL Keys)

**Laboratory diseased *O. faveolata* (based on VcpA test)**

|                                       | <b>Total</b>  | <b>VcpA-</b> | <b>VcpA+</b>  |
|---------------------------------------|---------------|--------------|---------------|
| <b># coral fragments</b>              | <b>24</b>     | <b>18</b>    | <b>6</b>      |
| <b>Disease stopped</b>                | 8<br>(33.3%)  | 8<br>(44.4%) | 0<br>(0.0%)   |
| <b>Slow progression over &gt;21 d</b> | 2<br>(0.8%)   | 2<br>(11.1%) | 0<br>(0.0%)   |
| <b>Complete mortality &lt;21 d</b>    | 12<br>(50.0%) | 6<br>(33.3%) | 6<br>(100.0%) |
| <b>Tissue loss only</b>               | 10<br>(41.7%) | 4<br>(22.2%) | 6<br>(100.0%) |
| <b>Tissue loss + Bleaching</b>        | 9<br>(37.5%)  | 9<br>(50.0%) | 0<br>(0.0%)   |
| <b>Bleaching only</b>                 | 3<br>(12.5%)  | 3<br>(16.7%) | 0<br>(0.0%)   |

\*Percents are out of the total corals with a specific VcpA assay result (Total, VcpA-, or VcpA+)
