# Supplementary material
Source: publisher figshare collection journal article supplement (https://frontiersin.figshare.com/ndownloader/files/25261439)
Supplement: Supplementary file 4 [file 25261439]

**Supplementary File S2. Origin of coral hosts for the Florida *V. coralliilyticus* strains.**

| <b>Strains</b>                                    | <b>Diseased coral species</b> | <b>Diseased coral origin (GPS coordinates)</b>             | <b>Healthy or infected coral species</b> | <b>Healthy or infected coral origin</b> |
|---------------------------------------------------|-------------------------------|------------------------------------------------------------|------------------------------------------|-----------------------------------------|
| <i>V. coralliilyticus</i><br>OfT6-17              | <i>M. cavernosa</i>           | Ft. Lauderdale, FL<br>(26° 08'54.91" N<br>81°05'45.29" W)  | <i>O. faveolata</i>                      | NOAA Key West Nursery                   |
| <i>V. coralliilyticus</i><br>OfT6-21              | <i>M. cavernosa</i>           | Ft. Lauderdale, FL<br>(26° 08'54.91" N<br>81°05'45.29" W)  | <i>O. faveolata</i>                      | NOAA Key West Nursery                   |
| <i>V. coralliilyticus</i><br>OfT7-21              | <i>M. cavernosa</i>           | Ft. Lauderdale, FL<br>(26° 08'54.91" N<br>81°05'45.29" W)  | <i>O. faveolata</i>                      | NOAA Key West Nursery                   |
| <i>V. coralliilyticus</i><br>MmMcT2-4             | <i>M. meandrites</i>          | Big Pine Key, FL Keys<br>(24° 32'31.2" N<br>81°24'42.0" W) | <i>M. cavernosa</i>                      | NOAA Key West Nursery                   |
| <sup>1</sup> <i>V. coralliilyticus</i><br>MCA25   | N/A                           | N/A                                                        | <i>M. cavernosa</i>                      | NOAA Key West Nursery                   |
| <sup>1</sup> <i>V. coralliilyticus</i><br>MCA32   | N/A                           | N/A                                                        | <i>M. cavernosa</i>                      | NOAA Key West Nursery                   |
| <sup>1</sup> <i>V. coralliilyticus</i><br>CN26H-1 | N/A                           | N/A                                                        | <i>C. natans</i>                         | NOAA Key West Nursery                   |
| <sup>1</sup> <i>V. coralliilyticus</i><br>CN52H-1 | N/A                           | N/A                                                        | <i>C. natans</i>                         | NOAA Key West Nursery                   |
| <sup>2</sup> <i>Vibrio</i> sp.<br>McD21-C1        | <i>M. cavernosa</i>           | Sand Key, FL Keys<br>(24°27'14.4" N<br>81°52'39.0" W)      | N/A                                      | N/A                                     |

<sup>1</sup>Isolated directly from an apparently healthy coral fragment; <sup>2</sup>isolated directly from a diseased coral fragment; N/A =not applicable.
